# Supplementary material for: Increase in muscle mass associated with the prebiotic effects of 1-kestose in super-elderly patients with sarcopenia
Source: PubMed Central journal article supplement — Biosci Microbiota Food Health. 2021 Feb 20;40(3):150–5. doi: 10.12938/bmfh.2020-063 (PMC8279888; doi:10.12938/bmfh.2020-063), 2021-02-20
Supplement: bmfh-40-150-s001.pdf [file bmfh-40-150-s001.pdf]

# Supplementary Figure

|                                      | 0w       |          |          |          |          |          | 4w       |          |          |          |          |          | 8w       |          |          |          |          |          | 12w      |          |          |         |          |          | 16w      |          |          |          |          |          |
|--------------------------------------|----------|----------|----------|----------|----------|----------|----------|----------|----------|----------|----------|----------|----------|----------|----------|----------|----------|----------|----------|----------|----------|---------|----------|----------|----------|----------|----------|----------|----------|----------|
|                                      | Case1    | Case2    | Case3    | Case4    | Case5    | Case6    | Case1    | Case2    | Case3    | Case4    | Case5    | Case6    | Case1    | Case2    | Case3    | Case4    | Case5    | Case6    | Case1    | Case2    | Case3    | Case4   | Case5    | Case6    | Case1    | Case2    | Case3    | Case4    | Case5    | Case6    |
| f__Ruminococcaceae;g__               | 11.14964 | 8.489733 | 14.34595 | 30.62106 | 9.338639 | 12.95253 | 6.430139 | 7.63211  | 0.691796 | 13.35709 | 23.7926  | 27.66971 | 13.47492 | 4.871359 | 4.419828 | 16.30764 | 26.56167 | 19.62114 | 11.76651 | 5.678594 | 7.652223 | no data | 18.93726 | 13.90126 | 6.613218 | 7.438645 | 6.143352 | 16.37873 | 21.41452 | 7.491839 |
| g__Bifidobacterium                   | 0.006799 | 10.97604 | 0.263545 | 4.341649 | 0.243322 | 0.026176 | 8.048009 | 49.58082 | 50.30067 | 41.93129 | 10.11692 | 0.263234 | 2.527241 | 35.98582 | 44.88201 | 36.69906 | 8.568281 | 0.988486 | 0.071578 | 8.04481  | 9.187424 | no data | 3.225389 | 0.031157 | 0.064491 | 5.174455 | 0.168989 | 2.737629 | 0.713711 | 0.006422 |
| g__Blautia                           | 2.950936 | 6.499692 | 7.182973 | 5.117626 | 16.35291 | 16.3076  | 12.62936 | 2.728332 | 1.659822 | 3.057675 | 4.263543 | 12.20804 | 2.349793 | 2.858334 | 3.904811 | 3.93222  | 5.198147 | 16.96721 | 2.192617 | 4.530948 | 5.725653 | no data | 16.58619 | 4.777421 | 1.508201 | 13.1934  | 15.10181 | 3.780842 | 12.99257 | 7.084069 |
| g__Streptococcus                     | 1.597857 | 17.86208 | 0.696123 | 0.18853  | 11.80754 | 3.615692 | 4.865011 | 13.15604 | 2.635181 | 0.433048 | 15.12233 | 5.311531 | 2.26107  | 29.83447 | 0.594934 | 0.420975 | 9.430155 | 10.07297 | 6.99125  | 8.670213 | 1.202214 | no data | 16.1993  | 2.192681 | 0.299002 | 7.036674 | 1.145825 | 0.062722 | 15.71359 | 1.694226 |
| g__Bacteroides                       | 7.03193  | 2.744425 | 0.432578 | 17.21905 | 6.932858 | 19.44871 | 9.695812 | 1.924434 | 3.410091 | 2.511523 | 3.435613 | 7.708524 | 6.906591 | 2.919287 | 0.958998 | 3.990485 | 10.23821 | 3.076886 | 7.9203   | 20.51902 | 4.255319 | no data | 4.363224 | 4.365888 | 1.373357 | 6.639089 | 5.922842 | 7.082968 | 4.065604 | 12.1539  |
| f__Lachnospiraceae;g__               | 4.535194 | 9.871938 | 8.037224 | 6.164103 | 16.44255 | 6.501872 | 2.749665 | 4.270504 | 2.76474  | 7.447031 | 3.160378 | 6.471546 | 2.119666 | 1.174131 | 4.717295 | 8.337179 | 3.281845 | 10.16283 | 1.638985 | 4.961315 | 7.392752 | no data | 5.098171 | 4.391852 | 2.340716 | 5.955009 | 12.61438 | 15.12337 | 6.131065 | 5.572858 |
| f__Enterobacteriaceae;Other          | 0.44332  | 2.664491 | 0.141769 | 0.193994 | 0.039334 | 0.607737 | 10.86752 | 0.141092 | 0.136893 | 0.03641  | 0.000742 | 8.786089 | 7.042449 | 5.681381 | 0.077697 | 0.054883 | 0.005045 | 0.42415  | 5.045503 | 3.989362 | 1.13086  | no data | 0.002285 | 38.0519  | 49.48921 | 3.489103 | 0.088616 | 1.994189 | 0.005576 | 32.27377 |
| f__Lachnospiraceae;g__[Ruminococcus] | 16.87065 | 5.197422 | 13.31177 | 7.172327 | 7.763447 | 2.525408 | 12.01072 | 0.907256 | 2.862521 | 1.494364 | 2.59062  | 3.645125 | 8.984667 | 0.434685 | 3.096766 | 1.138816 | 2.080268 | 6.047136 | 11.04197 | 6.017086 | 2.787148 | no data | 6.503328 | 2.057667 | 8.396969 | 6.541154 | 4.533839 | 1.746991 | 5.46435  | 3.315674 |
| f__Ruminococcaceae;g__Ruminococcus   | 30.13898 | 5.863545 | 16.76148 | 0.382524 | 3.533663 | 12.26058 | 5.470821 | 0.838351 | 0.300675 | 0.899407 | 6.61157  | 1.288286 | 20.22763 | 0.014436 | 1.036695 | 1.561038 | 5.237667 | 2.589233 | 0.064274 | 1.879433 | 2.272531 | no data | 2.496535 | 0.166171 | 5.761649 | 4.607311 | 0.950045 | 0.718535 | 5.57985  | 1.211537 |
| o__Clostridiales;f__g__              | 2.485857 | 5.733651 | 9.00598  | 2.314271 | 10.35218 | 2.585726 | 3.101748 | 2.821846 | 3.979662 | 2.665685 | 5.430509 | 1.783523 | 4.140904 | 0.850122 | 5.125758 | 2.550174 | 3.920052 | 2.991817 | 1.406722 | 2.749839 | 4.832641 | no data | 6.491143 | 1.609783 | 1.553637 | 9.534738 | 10.89152 | 1.854909 | 5.90803  | 1.001766 |
| g__Oscillospira                      | 3.333061 | 1.627005 | 3.215253 | 1.478182 | 1.397731 | 1.849386 | 2.21085  | 0.615228 | 1.263811 | 0.186699 | 4.357019 | 1.171169 | 6.243935 | 0.038496 | 5.156836 | 0.242606 | 2.997637 | 1.908676 | 1.589319 | 0.680206 | 8.750649 | no data | 1.626784 | 0.913942 | 1.219459 | 1.129902 | 7.534416 | 0.317299 | 2.260616 | 1.109862 |
| f__Clostridiaceae;g__                | 1.56114  | 1.900115 | 4.663843 | 3.024673 | 0.719905 | 0.260621 | 5.594834 | 0.838351 | 1.019361 | 0.460162 | 0.986691 | 0.342428 | 1.322539 | 0.944758 | 0.985637 | 0.302478 | 1.232689 | 0.179725 | 16.831   | 2.857834 | 1.556824 | no data | 0.9977   | 4.033546 | 2.724728 | 5.46095  | 2.137087 | 0.217682 | 0.76947  | 2.309627 |
| f__Enterobacteriaceae;g__            | 1.506745 | 0.656131 | 0.149039 | 0.051914 | 0.01921  | 0.154779 | 1.203068 | 0.090233 | 0.036668 | 2.789635 | 0.001484 | 1.482366 | 4.763357 | 1.081098 | 0.013319 | 2.709833 | 0.002523 | 0.119816 | 4.265451 | 0.720503 | 0.391368 | no data | 0.017517 | 4.789105 | 5.546191 | 0.827328 | 0.391559 | 24.04833 | 0        | 3.976026 |
| g__Dorea                             | 3.770942 | 3.09414  | 2.173795 | 1.710429 | 1.184596 | 5.158933 | 2.004162 | 0.063984 | 0.704019 | 0.811868 | 0.664718 | 3.292658 | 0.783264 | 0.137944 | 0.193132 | 0.825735 | 0.578506 | 3.018176 | 2.281724 | 2.187299 | 1.444387 | no data | 1.035019 | 3.25332  | 0.869157 | 2.088784 | 2.532767 | 0.568187 | 0.739201 | 4.631027 |
| g__Collinsella                       | 0.00136  | 1.413845 | 4.778349 | 2.016449 | 0.12532  | 1.317901 | 0        | 1.917871 | 11.18363 | 1.97002  | 0.723326 | 1.899525 | 0.004159 | 1.78686  | 5.174595 | 1.776827 | 0.498625 | 4.968788 | 0.011686 | 1.640877 | 2.996886 | no data | 0.574249 | 7.732192 | 0.01026  | 1.00858  | 0.980958 | 0.366185 | 0.396683 | 0.431316 |
| g__Roseburia                         | 0.013599 | 2.519609 | 1.933877 | 0        | 0.026528 | 0.742031 | 0.021382 | 1.082802 | 1.036472 | 1.670217 | 0.101637 | 0.37589  | 0.008318 | 1.127615 | 1.917997 | 2.272642 | 0.185828 | 1.452175 | 0        | 3.268859 | 8.726864 | no data | 0.639747 | 0.364798 | 0.011726 | 3.193837 | 3.262303 | 9.766176 | 0.643614 | 1.22331  |
| g__Faecalibacterium                  | 0.129188 | 0.81267  | 0        | 8.423727 | 0.864435 | 0.917295 | 0.297916 | 1.724279 | 0.004889 | 3.107255 | 1.460748 | 4.299864 | 0.389553 | 1.227063 | 0        | 3.420813 | 1.890235 | 1.278441 | 1.151088 | 0.746293 | 0.002162 | no data | 1.441715 | 1.777253 | 0.165624 | 0.884335 | 0        | 3.767929 | 1.957926 | 0.65179  |
| g__Prevotella                        | 0.013599 | 0.021649 | 0.723386 | 0        | 0.007318 | 0.314111 | 0.025658 | 0.011484 | 5.622372 | 0.003873 | 0        | 4.048899 | 0.005545 | 0.00802  | 3.079006 | 0.004989 | 0.004204 | 0.015576 | 0.020451 | 0.003224 | 13.36923 | no data | 0.001523 | 3.429877 | 0.008794 | 0.010232 | 1.739945 | 0.007379 | 0        | 3.5019   |
| f__Lachnospiraceae;Other             | 0.363087 | 0.497927 | 1.468584 | 1.759611 | 2.781742 | 1.498856 | 0.332126 | 0.175545 | 2.102278 | 1.384359 | 1.217413 | 0.731702 | 0.378462 | 0.078596 | 1.775923 | 1.857904 | 2.403996 | 1.601946 | 0.308223 | 0.30303  | 1.245459 | no data | 3.255853 | 0.362201 | 0.002931 | 2.448365 | 5.898969 | 0.016603 | 0.657952 | 0.007492 |
| g__Akkermansia                       | 1.444191 | 1.968392 | 0.003635 | 0        | 0.025613 | 0.359634 | 0.002851 | 0.392105 | 0.002445 | 0        | 7.318575 | 0.638008 | 0.486594 | 0.00802  | 0.00222  | 0.001871 | 4.387565 | 0.236038 | 0        | 1.207286 | 4.882373 | no data | 0        | 0.051928 | 0.002931 | 2.448365 | 5.898969 | 0.016603 | 0.657952 | 0.007492 |
| Others                               | 10.65193 | 9.585505 | 10.71085 | 7.819886 | 10.04116 | 10.59442 | 12.43835 | 9.08733  | 8.281999 | 13.78239 | 8.64356  | 8.581881 | 15.57934 | 8.937508 | 12.88654 | 11.59147 | 11.29685 | 12.27879 | 25.40135 | 19.34397 | 10.19504 | no data | 10.50708 | 8.746057 | 11.69332 | 12.63941 | 16.76696 | 7.834709 | 11.1605  | 9.914914 |
